# Supplementary material
Source: PubMed Central journal article supplement (PMC8546027)
Supplement: NIHMS1698774-supplement-1.pdf [file NIHMS1698774-supplement-1.pdf]

## Supplement 1. Survivor Population Flowchart

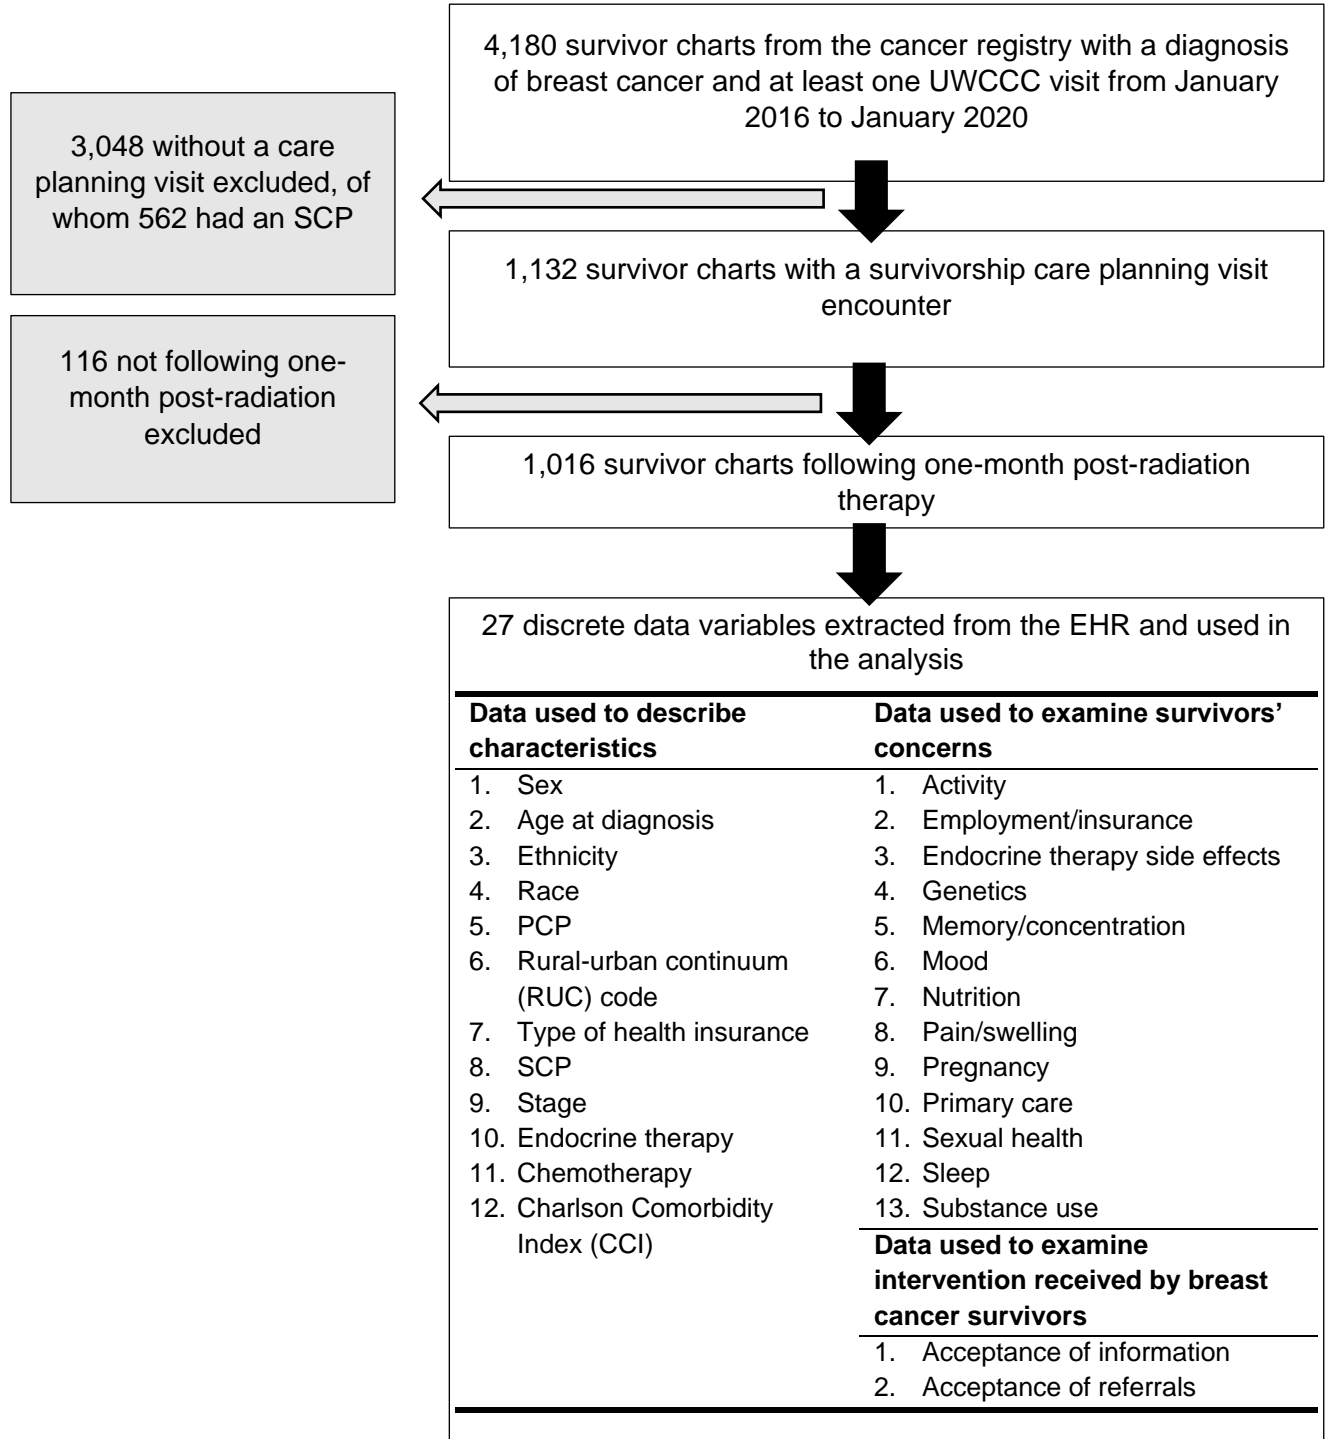

## Supplement 2. Survivorship Questionnaire

Patient Name

DOB:

MR #

University of Wisconsin Hospitals and Clinics  
University of Wisconsin Medical Foundation  
**BREAST CENTER SURVIVORSHIP  
QUESTIONNAIRE**

Date: \_\_\_\_\_

### Welcome to the UW Health Breast Center Survivorship Program!

At this visit, we will review your treatment history, talk about what to watch for in the future, and review your follow-up schedule for the next several years.

Please answer the following questions-your answers will help us offer you resources to support a smooth transition back to your normal activities. Please mark **ALL** areas that are true for you.

#### 1. Nutrition

- |                                                           |                                                            |
|-----------------------------------------------------------|------------------------------------------------------------|
| <input type="checkbox"/> I would like to lose weight.     | <input type="checkbox"/> I would like more information.    |
| <input type="checkbox"/> I would like to gain weight.     | <input type="checkbox"/> I want a referral to a dietitian. |
| <input type="checkbox"/> I would like to improve my diet. | <input type="checkbox"/> I need nothing further.           |
| <input type="checkbox"/> I have no concerns in this area. |                                                            |

#### 2. Activity

- |                                                                   |                                                                                  |
|-------------------------------------------------------------------|----------------------------------------------------------------------------------|
| <input type="checkbox"/> I have problems with weakness.           | <input type="checkbox"/> I would like more information.                          |
| <input type="checkbox"/> I have problems with fatigue.            | <input type="checkbox"/> I want to talk to a specialist about my activity level. |
| <input type="checkbox"/> I get short of breath with activity.     | <input type="checkbox"/> I need nothing further.                                 |
| <input type="checkbox"/> I want to increase my physical activity. |                                                                                  |
| <input type="checkbox"/> I have no concerns in this area.         |                                                                                  |

#### 3. Mood

- |                                                                                                                       |                                                                      |
|-----------------------------------------------------------------------------------------------------------------------|----------------------------------------------------------------------|
| <input type="checkbox"/> I feel nervous or worried.                                                                   | <input type="checkbox"/> I would like more information.              |
| <input type="checkbox"/> I feel sad or depressed.                                                                     | <input type="checkbox"/> I want a referral to a health psychologist. |
| <input type="checkbox"/> I have lost interest in things I used to enjoy.                                              | <input type="checkbox"/> I need nothing further.                     |
| <input type="checkbox"/> I notice changes in my relationships with others (partner, children, friends) due to cancer. |                                                                      |
| <input type="checkbox"/> I have no concerns in this area.                                                             |                                                                      |

#### 4. Sleep

- |                                                                 |                                                                    |
|-----------------------------------------------------------------|--------------------------------------------------------------------|
| <input type="checkbox"/> I have trouble falling asleep.         | <input type="checkbox"/> I would like more information.            |
| <input type="checkbox"/> I have trouble staying asleep.         | <input type="checkbox"/> I want a referral for a sleep evaluation. |
| <input type="checkbox"/> I feel very sleepy during the day.     | <input type="checkbox"/> I need nothing further.                   |
| <input type="checkbox"/> My legs are restless during the night. |                                                                    |
| <input type="checkbox"/> I have no concerns in this area.       |                                                                    |

#### 5. Sexual Health

- |                                                                          |                                                                         |
|--------------------------------------------------------------------------|-------------------------------------------------------------------------|
| <input type="checkbox"/> I am bothered by hot flashes.                   | <input type="checkbox"/> I would like more information.                 |
| <input type="checkbox"/> I am having vaginal dryness or pain during sex. | <input type="checkbox"/> I want a referral to a sexual health provider. |
| <input type="checkbox"/> I have no or low interest in sex.               | <input type="checkbox"/> I need nothing further.                        |
| <input type="checkbox"/> I have concerns about body image.               |                                                                         |
| <input type="checkbox"/> I have no concerns in this area.                |                                                                         |

#### 6. Employment/Insurance

- |                                                                                 |                                                                         |
|---------------------------------------------------------------------------------|-------------------------------------------------------------------------|
| <input type="checkbox"/> I have financial problems due to cancer.               | <input type="checkbox"/> I would like more information.                 |
| <input type="checkbox"/> I have insurance issues or problems because of cancer. | <input type="checkbox"/> I want to meet with a Breast Center navigator. |
| <input type="checkbox"/> I am unable to work because of cancer.                 | <input type="checkbox"/> I need nothing further.                        |
| <input type="checkbox"/> I have difficulty working due to cancer.               |                                                                         |
| <input type="checkbox"/> I have no concerns in this area.                       |                                                                         |

Patient Name \_\_\_\_\_

DOB: \_\_\_\_\_

MR # \_\_\_\_\_

University of Wisconsin Hospitals and Clinics  
University of Wisconsin Medical Foundation  
**BREAST CENTER SURVIVORSHIP  
QUESTIONNAIRE**

**7. Pain & Swelling**

- I am having pain. Where? \_\_\_\_\_  
How bad is your pain? 1 2 3 4 5 6 7 8 9 10
- I have neuropathy (numbness or tingling in the hands, feet or arm). Where? \_\_\_\_\_
- I have trouble moving a part of my body. Where? \_\_\_\_\_
- I have swelling (in breast, armpit, or arm). Where? \_\_\_\_\_
- I have no concerns in this area.
- I would like more information.
- I want a referral to a specialist.
- I need nothing further.

**8. Pregnancy**

- I would like to get pregnant.
- I want to be sure NOT to get pregnant.
- I am not worried about pregnancy.
- I would like more information.
- I want a referral.
- I need nothing further.

**9. Memory & Concentration**

- I have trouble concentrating.
- I have trouble multi-tasking.
- My memory is poor.
- My thinking is slow.
- I have no concerns in this area.
- I would like more information.
- I want a referral.
- I need nothing further.

**10. Additional Concerns**

- I would like to quit smoking.
- I would like to cut down on my drinking.
- I need help finding a primary care provider.
- I would like more information about the risk of future cancers for me or my family members
- Other concern(s) we should ask about please list: \_\_\_\_\_
- I would like more information.
- I need nothing further.

**11. Please add a checkmark in each column to show how satisfied you are with your knowledge of:**

|                                             | Extremely satisfied      | Somewhat satisfied       | Neither satisfied or unsatisfied | Somewhat unsatisfied     | Extremely unsatisfied    |
|---------------------------------------------|--------------------------|--------------------------|----------------------------------|--------------------------|--------------------------|
| The cancer diagnosis                        | <input type="checkbox"/> | <input type="checkbox"/> | <input type="checkbox"/>         | <input type="checkbox"/> | <input type="checkbox"/> |
| The treatment you received                  | <input type="checkbox"/> | <input type="checkbox"/> | <input type="checkbox"/>         | <input type="checkbox"/> | <input type="checkbox"/> |
| Your understanding of possible side effects | <input type="checkbox"/> | <input type="checkbox"/> | <input type="checkbox"/>         | <input type="checkbox"/> | <input type="checkbox"/> |
| Your plan for future follow-up              | <input type="checkbox"/> | <input type="checkbox"/> | <input type="checkbox"/>         | <input type="checkbox"/> | <input type="checkbox"/> |

Signature of Patient/Representative \_\_\_\_\_ Date: \_\_\_\_\_ Time: \_\_\_\_\_ AM/PM

If signed by person other than the patient, print name and state relationship and authority to do so.

Print Name: \_\_\_\_\_ Relationship: \_\_\_\_\_

Patient is:  Minor  Incompetent / Incapacitated

Legal Authority:  Legal Guardian  Parent of Minor  Health Care Agent  Other \_\_\_\_\_

Reviewed by: \_\_\_\_\_ Date: \_\_\_\_\_ Time: \_\_\_\_\_ AM/PM
